# Supplementary material for: Understanding Pediatric Norovirus Epidemiology: A Decade of Study among Ghanaian Children
Source: MDPI journal article supplement (doi:10.3390/v12111321), 2020-11-18
Supplement: s1 [file s1]

**Supplementary Table 1:** Demographic features associated with Norovirus detection in the Ghanaian pediatric population between 2008 and 2017.

| Parameters                     | Total Tested | NoV Pos (%) | OR (95% CI)        | p-Value |
|--------------------------------|--------------|-------------|--------------------|---------|
| <b>All Study Samples</b>       | 1337         | 485 (36.3)  | -                  | -       |
| <b>Study Period</b>            |              |             |                    |         |
| Pre-vaccine Years (2008–2012)  | 652          | 154 (23.6)  | Ref                |         |
| Post-Vaccine Years (2013–2017) | 685          | 331 (48.3)  | 3.02 (2.391–3.824) | 0.000   |
| <b>Study Site</b>              |              |             |                    |         |
| Middle Belt                    | 58           | 17 (29.3)   | Ref                |         |
| Southern Belt                  | 506          | 232 (45.8)  | 2.04 (1.130–3.690) | 0.018   |
| Northern Belt                  | 773          | 236 (30.5)  | 1.06 (0.590–1.903) | 0.846   |
| <b>Gender</b>                  |              |             |                    |         |
| Male                           | 663          | 251 (37.9)  | Ref                |         |
| Female                         | 534          | 196 (36.7)  | 0.95 (0.752–1.205) | 0.682   |
| * Unknown                      | 140          | 38 (27.1)   | -                  | -       |
| <b>Age (Months)</b>            |              |             |                    |         |
| >36                            | 46           | 17 (37.0)   | Ref                |         |
| 25–36                          | 74           | 29 (39.2)   | 1.10 (0.514–2.349) | 0.807   |
| 19–24                          | 115          | 49 (42.6)   | 1.27 (0.627–2.559) | 0.510   |
| 12–18                          | 371          | 136 (36.7)  | 0.99 (0.523–1.863) | 0.968   |
| 6–11                           | 382          | 135 (35.3)  | 0.93 (0.494–1.758) | 0.829   |
| <6                             | 209          | 81 (38.8)   | 1.08 (0.558–2.089) | 0.820   |
| * Unknown                      | 140          | 38 (27.1)   | -                  | -       |
| <b>GC of Patient</b>           |              |             |                    |         |
| Normal                         | 392          | 115 (29.3)  | Ref                |         |
| Irritable                      | 461          | 164 (35.6)  | 1.33 (0.996–1.776) | 0.053   |
| Drowsy and Lethargic           | 51           | 27 (52.9)   | 2.71 (1.500–4.895) | 0.001   |
| Unconscious                    | 1            | 0           | -                  | -       |

\* Missing data excluded from all statistical analysis; CI: Confidence Interval; OR: Odds Ratio; NoV: Norovirus; GC: General Condition of patient; Ref: Reference.

**Supplementary Table 2a:** Age-stratified norovirus genotypes detected in children with AGE in Ghana.

|                      | Age (Months) |            |          |           | Total No. of Cases |
|----------------------|--------------|------------|----------|-----------|--------------------|
|                      | <6           | 6–24       | >24      | * Unknown |                    |
| No. of typed samples | 34           | 126        | 7        | 7         | 174                |
| GI Genotypes         |              |            |          |           | 18                 |
| Cap/Pol              |              |            |          |           | 14                 |
| GI.4[P4]             | 3            | 1          | 1        | 0         | 5                  |
| GI.7[P7]             | 2            | 2          | 0        | 0         | 4                  |
| GI.3[P3]             | 0            | 2          | 0        | 0         | 2                  |
| GI.1[P1]             | 1            | 0          | 0        | 0         | 1                  |
| GI.3[P13]            | 0            | 1          | 0        | 0         | 1                  |
| GI.3[P14]            | 0            | 1          | 0        | 0         | 1                  |
| Cap/Pol[nd]          |              |            |          |           | 4                  |
| GI.7                 | 0            | 2          | 0        | 1         | 3                  |
| GI.4                 | 0            | 1          | 0        | 0         | 1                  |
| GII Genotypes        |              |            |          |           | 152                |
| Cap/Pol              |              |            |          |           | 109                |
| GII.4[P4]            | 9            | 34         | 2        | 0         | 45                 |
| GII.4[P16]           | 3            | 13         | 0        | 0         | 16                 |
| GII.3P[21]           | 0            | 10         | 1        | 0         | 11                 |
| GII.4[P31]           | 2            | 4          | 0        | 2         | 8                  |
| GII.6[P7]            | 1            | 6          | 0        | 0         | 7                  |
| GII.21[P21]          | 0            | 5          | 0        | 0         | 5                  |
| GII.17[P17]          | 0            | 3          | 0        | 0         | 3                  |
| GII.9[P7]            | 0            | 1          | 1        | 0         | 2                  |
| GII.8[P8]            | 0            | 2          | 0        | 0         | 2                  |
| GII.1[P33]           | 0            | 1          | 0        | 0         | 1                  |
| GII.2[P30]           | 0            | 1          | 0        | 0         | 1                  |
| GII.2[P31]           | 0            | 1          | 0        | 0         | 1                  |
| GII.3[P16]           | 0            | 1          | 0        | 0         | 1                  |
| GII.3[P30]           | 0            | 1          | 0        | 0         | 1                  |
| GII.4[P7]            | 0            | 1          | 0        | 0         | 1                  |
| GII.5[P16]           | 0            | 1          | 0        | 0         | 1                  |
| GII.17[P3]           | 0            | 1          | 0        | 0         | 1                  |
| GII.17[P13]          | 0            | 1          | 0        | 0         | 1                  |
| GII.17[P31]          | 1            | 0          | 0        | 0         | 1                  |
| Cap/Pol[nd]          |              |            |          |           | 43                 |
| GII.4                | 4            | 13         | 2        | 3         | 22                 |
| GII.5                | 4            | 2          | 0        | 0         | 6                  |
| GII.12               | 1            | 2          | 0        | 1         | 4                  |
| GII.2                | 1            | 2          | 0        | 0         | 3                  |
| GII.13               | 1            | 1          | 0        | 0         | 2                  |
| GII.17               | 0            | 2          | 0        | 0         | 2                  |
| GII.6                | 0            | 2          | 0        | 0         | 2                  |
| GII.7                | 0            | 1          | 0        | 0         | 1                  |
| GII.10               | 0            | 1          | 0        | 0         | 1                  |
| <b>Total</b>         | <b>33</b>    | <b>123</b> | <b>7</b> | <b>7</b>  | <b>170</b>         |

No. of typed samples: Number samples genotyped; \* Unknown: Information on Age was not available; Cap: Capsid genotype; Pol: Polymerase genotype; P[nd]: Polymerase genotyped not determined; NB: Four (4) capsid sequences presumptively typed as other non-human calicivirus were excluded from subsequent analysis.

**Supplementary Table 2b:** Age-stratified norovirus genogroups detected in children with AGE in Ghana.

|                        | Age (Months)     |                   |                 |                    | Total<br>N (%)   |
|------------------------|------------------|-------------------|-----------------|--------------------|------------------|
|                        | < 6<br>N (%)     | 6–24<br>N (%)     | > 24<br>N (%)   | * Unknown<br>N (%) |                  |
| <b>No. Pos Samples</b> | <b>81 (16.7)</b> | <b>320 (66.0)</b> | <b>46 (9.5)</b> | <b>38 (7.8)</b>    | <b>485 (100)</b> |
| <b>NoV Genogroups</b>  |                  |                   |                 |                    |                  |
| GI                     | 14 (20.6)        | 43 (63.2)         | 11 (16.2)       | 2 (2.9)            | 70 (14.4)        |
| GII                    | 60 (17.8)        | 248 (73.6)        | 29 (8.6)        | 35 (9.4)           | 372 (76.7)       |
| GI/GII                 | 7 (16.7)         | 29 (69.1)         | 6 (14.3)        | 1 (2.3)            | 43 (8.9)         |

No. Pos Samples: Number of positive samples; \* Unknown: Information on Age was not available.
